# Supplementary material
Source: publisher figshare collection journal article supplement (https://acs.figshare.com/ndownloader/files/4347922)
Supplement: Supplementary file 1 [file 4347922]

## Supplemental information:

Dicetyl phosphate-tetraethylenepentamine-based Liposomes for Systemic siRNA Delivery

Tomohiro Asai,<sup>†,\*</sup> Saori Matsushita,<sup>†</sup> Eriya Kenjo,<sup>†</sup> Takuma Tsuzuku,<sup>†</sup> Norihito Yonenaga,<sup>†</sup> Hiroyuki Koide,<sup>†</sup> Kentaro Hatanaka,<sup>†</sup> Takehisa Dewa,<sup>‡</sup> Mamoru Nango,<sup>‡</sup> Noriyuki Maeda,<sup>§</sup> Hiroshi Kikuchi,<sup>⊥</sup> and Naoto Oku<sup>†</sup>

<sup>†</sup>Department of Medical Biochemistry and Global COE, University of Shizuoka Graduate School of Pharmaceutical Sciences, 52-1 Yada, Suruga-ku, Shizuoka 422-8526, Japan

<sup>‡</sup>Department of Life and Materials Engineering, Nagoya Institute of Technology, Gokiso-cho, Showa-ku, Nagoya 466-8555, Japan

<sup>§</sup>Nippon Fine Chemical Co. Ltd., 5-1-1 Umei, Takasago, Hyogo 676-0074, Japan

<sup>⊥</sup>DDS Research, Formulation Research Labs, Eisai Co., Ltd., 5-1-3 Tokodai, Tsukuba, 300-2635, Japan

A list of content

Supplemental Fig. 1: pH-dependent alteration of  $\zeta$ -potential of TEPA-PCL      Page 2

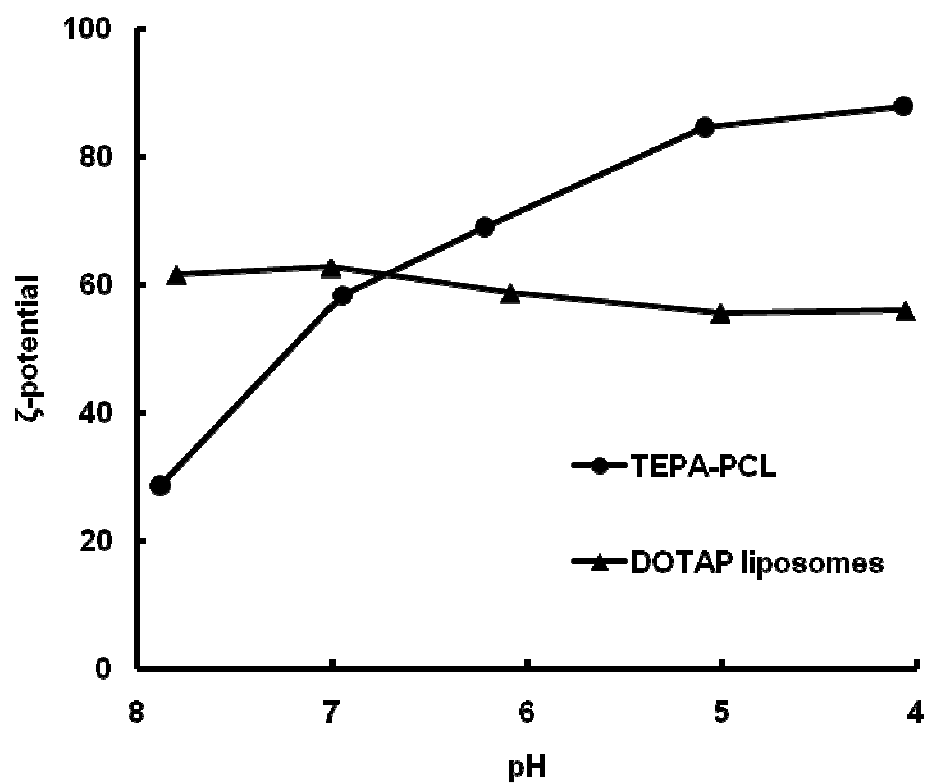

Supplemental Fig. 1. pH-dependent alteration of  $\zeta$ -potential of TEPA-PCL  
 $\zeta$ -potential of TEPA-PCL (DCP-TEPA/DOPE/DPPC/cholesterol=0.25/1/0.75/1) and DOTAP liposomes (DOTAP/cholesterol=1/1) were measured in water (pH= approx. 4.1-7.9) by using the Zetasizer Nano ZS and MPT-2.
